# Supplementary material for: Gold-Based Catalysts for Complete Formaldehyde Oxidation: Insights into the Role of Support Composition
Source: MDPI journal article supplement (doi:10.3390/catal12070705), 2022-06-27
Supplement: s1 [file s1]

## Gold-based catalysts for complete formaldehyde oxidation: insights into the role of support composition

Lyuba Ilieva <sup>1</sup>, Dimitar Dimitrov <sup>2</sup>, Elitsa Kolentsova <sup>2</sup>, Anna Maria Venezia <sup>3</sup>, Daniela Karashanova <sup>4</sup>, Georgi Avdeev <sup>5</sup>, Petya Petrova <sup>1</sup>, Razvan State <sup>6</sup> and Tatyana Tabakova <sup>1,\*</sup>

<sup>1</sup>Institute of Catalysis, Bulgarian Academy of Sciences, 1113 Sofia, Bulgaria;

<sup>2</sup>Department of Chemistry and Phytopharmacy, Agricultural University, 4000 Plovdiv, Bulgaria

<sup>3</sup>Istituto per lo Studio dei Materiali Nanostrutturati, CNR, 90146, Palermo, Italy

<sup>4</sup>Institute of Optical Materials and Technologies, Bulgarian Academy of Sciences, 1113 Sofia, Bulgaria

<sup>5</sup>Institute of Physical Chemistry, Bulgarian Academy of Sciences, 1113 Sofia, Bulgaria;

<sup>6</sup>“Ilie Murgulescu” Institute of Physical Chemistry, Romanian Academy, 060021, Bucharest, Romania

\*Correspondence: tabakova@ic.bas.bg

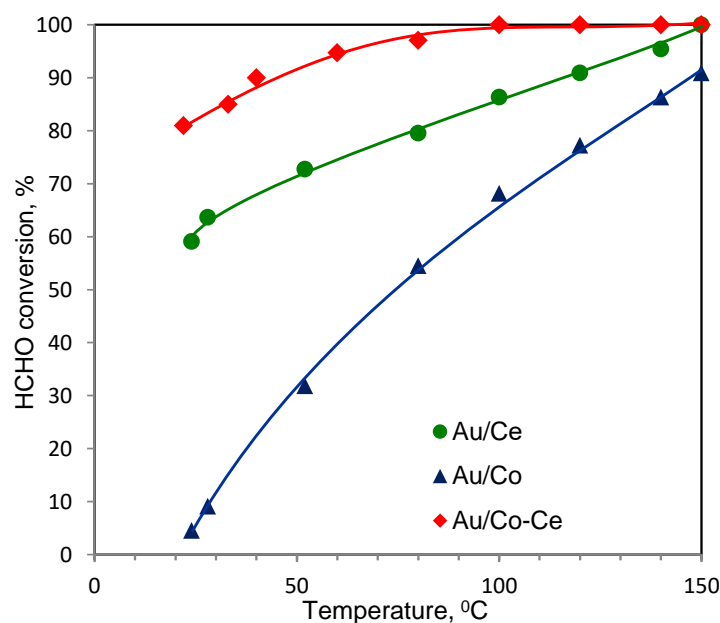

**Figure S1.** Comparison of HCHO conversion over Au/Ce, Au/Co, and Au/Co-Ce samples.

Table S1. HCHO conversion over the most active sample developed in this study compared with HCHO conversion over Co<sub>3</sub>O<sub>4</sub>-CeO<sub>2</sub>-supported Au-based catalysts reported in the literature.

| Catalyst                                                                                           | Au <sup>1</sup><br>amount<br>(wt.%) | Preparation<br>method <sup>2</sup>                                                 | WHSV<br>(mL h <sup>-1</sup> g <sup>-1</sup> ) | [HCHO] <sub>inlet</sub><br>concentration | T<br>(°C) | HCHO<br>conversion<br>(%) | Ref. <sup>3</sup> |
|----------------------------------------------------------------------------------------------------|-------------------------------------|------------------------------------------------------------------------------------|-----------------------------------------------|------------------------------------------|-----------|---------------------------|-------------------|
| Au/35%Co <sub>3</sub> O <sub>4</sub> -<br>5%CeO <sub>2</sub> /50%Al <sub>2</sub> O <sub>3</sub> -b | 3                                   | mechanochemical<br>mixing                                                          | 20,000                                        | 120 ppm                                  | 25<br>40  | 95<br>100                 | This<br>study     |
| Au/2DCo <sub>3</sub> O <sub>4</sub> -CeO <sub>2</sub><br>(Co/Ce=7:3)                               | 1                                   | nanocasting using 2D<br>SBA-15 as hard template                                    | 24,000                                        | 200 ppm                                  | 25        | 50                        | [5]               |
| Au/3DCeO <sub>2</sub> -Co <sub>3</sub> O <sub>4</sub><br>(Co/Ce=1:2.5)                             | 1                                   | precursor thermal<br>decomposition-assisted colloidal<br>crystal templating method | 15,000                                        | 8 ppm                                    | 25<br>100 | <10<br>100                | [25]              |
| Au/3DCeO <sub>2</sub> -Co <sub>3</sub> O <sub>4</sub><br>(Co/Ce=1:2.5)                             | 2                                   | precursor thermal<br>decomposition-assisted colloidal<br>crystal templating method | 15,000                                        | 8 ppm                                    | 25<br>70  | 35<br>100                 | [25]              |
| Au/3DCeO <sub>2</sub> -Co <sub>3</sub> O <sub>4</sub><br>(Co/Ce=1:2.5)                             | 3                                   | precursor thermal<br>decomposition-assisted colloidal<br>crystal templating method | 15,000                                        | 8 ppm                                    | 25<br>39  | 61<br>100                 | [25]              |
| Au/3DCeO <sub>2</sub> -Co <sub>3</sub> O <sub>4</sub><br>(Co/Ce=1:2.5)                             | 4                                   | precursor thermal<br>decomposition-assisted colloidal<br>crystal templating method | 15,000                                        | 8 ppm                                    | 25<br>60  | 50<br>100                 | [25]              |
| Au-Ce <sub>3</sub> Co/GA<br>(Co/Ce=1:3)<br>GA - graphene<br>aerogel                                | 1                                   | one-step method using SBA-15-<br>OH as a hard template, mixing<br>with GO          | 20,000                                        | 50 ppm                                   | 30<br>135 | 15<br>100                 | [27]              |
| Au-Ce <sub>3</sub> Co/GA<br>(Co/Ce=1:3)                                                            | 2                                   | one-step method using SBA-15-<br>OH as a hard template, mixing<br>with GO          | 20,000                                        | 50 ppm                                   | 30<br>105 | 30<br>100                 | [27]              |
| Au-Ce <sub>3</sub> Co/GA<br>(Co/Ce=1:3)                                                            | 3                                   | one-step method using SBA-15-<br>OH as a hard template, mixing<br>with GO          | 20,000                                        | 50 ppm                                   | 30<br>60  | 55<br>100                 | [27]              |
| Au-Ce <sub>3</sub> Co/GA<br>(Co/Ce=1:3)                                                            | 4                                   | one-step method using SBA-15-<br>OH as a hard template, mixing<br>with GO          | 20,000                                        | 50 ppm                                   | 30<br>75  | 50<br>100                 | [27]              |
| Au/CeCo <sub>9</sub> (Co<br>mol.%=9)                                                               | 1.5                                 | hydrothermal method                                                                | 30,000                                        | 100 ppmv                                 | 30<br>100 | 80<br>100                 | [28]              |
| Au/CeCo <sub>9</sub> (Co<br>mol.%=9)                                                               | 3                                   | hydrothermal method                                                                | 30,000                                        | 100 ppmv                                 | 30<br>100 | >90<br>100                | [28]              |

<sup>1</sup> Gold content presented as nominal wt. %

<sup>2</sup> Method of preparation of Co<sub>3</sub>O<sub>4</sub>-CeO<sub>2</sub>

<sup>3</sup> Reference numbers refer to citations in the paper.

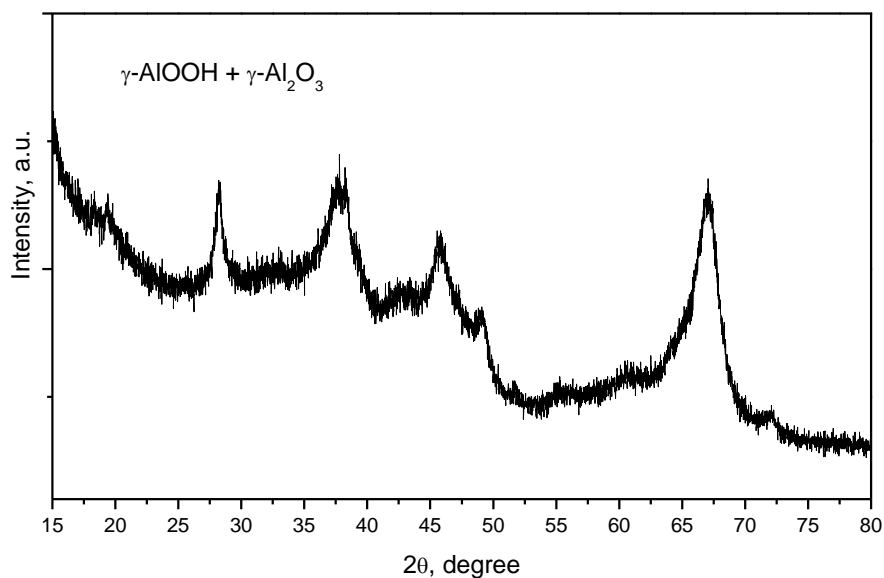

**Figure S2.** XRD pattern of  $\gamma\text{-Al}_2\text{O}_3$  used for preparation of  $\text{Co}_3\text{O}_4\text{-CeO}_2/\text{Al}_2\text{O}_3$  support.

XRD analysis showed a mixed phase of  $\gamma\text{-Al}_2\text{O}_3$  (ICSD-PDF 01-079-1558) and boehmite  $\gamma\text{-AlOOH}$  (ICSD-PDF 01-073-6509). For correct determination of  $\gamma\text{-AlOOH}$  amount a combined DTA/TG analysis was performed. The amount of absorbed water and associated OH groups in the structure of boehmite was evaluated. The first step, ambient temperature to endothermic peak at 122 °C, was due to dehydration of  $\gamma\text{-AlOOH}$  and finished at about 260 °C. The next endothermic effect was observed at about 270 °C. It was ascribed to decomposition of by-products of the synthesis reaction [B. Sathyaseelan, I. Baskaran, K. Sivakumar, Phase Transition Behavior of Nanocrystalline  $\text{Al}_2\text{O}_3$  Powders, *Soft Nanoscience Letters*, 2013, 3, 69-74]. Total weight loss at about 400 °C was nearly 13 %. The final step above 400–450 °C ended after 925 °C. It was related to the formation of  $\gamma\text{-Al}_2\text{O}_3$  with a weight loss of about 5 %. According to Földvári calculated amount of  $\gamma\text{-AlOOH}$  was 33.33 % [M. Földvári, Handbook of thermogravimetric system of minerals and its use in geological practice, Budapest, vol. 213, 2011, Published by the Geological Institute of Hungary].

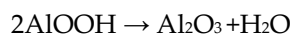

$$119.98 \rightarrow 101.96 + 18 \quad f = 119.98 / 18 = 6.65 \text{ (stoichiometric factor)}$$

$$6.65 \times 5 (\%) = 33.33 \%$$

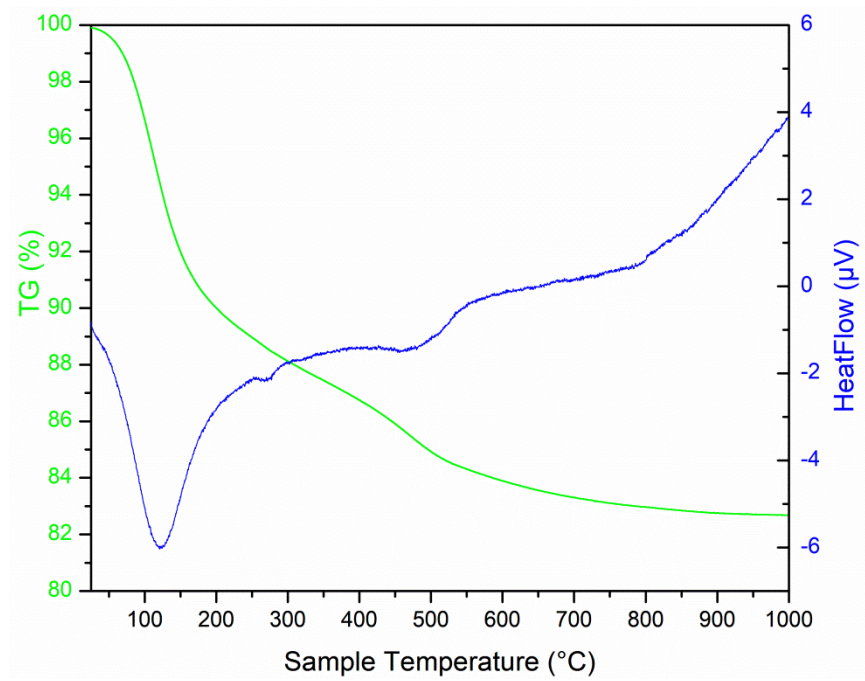

**Figure S3.** DTA/TG analysis of  $\gamma$ - $\text{Al}_2\text{O}_3$ .
